# Supplementary material for: Cannabinoid regulation of angiotensin II-induced calcium signaling in striatal neurons
Source: PubMed Central journal article supplement — NPJ Parkinsons Dis. 2024 Nov 15;10:220. doi: 10.1038/s41531-024-00827-7 (PMC11568119; doi:10.1038/s41531-024-00827-7), 2024-11-15
Supplement: 41531_2024_827_MOESM1_ESM.pdf [file 41531_2024_827_MOESM1_ESM.pdf]

## SUPPLEMENTARY MATERIAL

### Figure S1 and Figure S2

#### Cannabinoid regulation of angiotensin II-induced calcium signaling in striatal neurons

Rafael Rivas-Santisteban<sup>1,2\*</sup>, Ana Muñoz<sup>2,3</sup>, Jaume Lillo<sup>2,4</sup>, Iu Raïch<sup>2,4</sup>, Ana I. Rodríguez-Pérez<sup>2,3</sup>, Gemma Navarro<sup>2,4,5#</sup>, José L. Labandeira-García<sup>2,3#</sup>, Rafael Franco<sup>2,6,7#</sup>.

- <sup>1</sup> Laboratory of Computational Medicine, Biostatistics Unit, Faculty of Medicine, Autonomous University of Barcelona. Campus Bellaterra. 08193 Barcelona. Spain
- <sup>2</sup> Network Center for Biomedical Research in Neurodegenerative Diseases. CiberNed., Spanish National Health Institute Carlos iii. Av. Monforte de Lemos, 3-5. 28029 Madrid. Spain.
- <sup>3</sup> Cellular and Molecular Neurobiology of Parkinson's Disease, Research Center for Molecular Medicine and Chronic Diseases (CIMUS), IDIS, University of Santiago de Compostela, Santiago de Compostela; Spain.
- <sup>4</sup> Department of Biochemistry and Physiology. School of Pharmacy and Food Sciences. Universitat de Barcelona. 08028 Barcelona. Spain.
- <sup>5</sup> Institute of Neuroscience of the University of Barcelona. Universitat de Barcelona. 08028 Barcelona. Spain.
- <sup>6</sup> Molecular Neurobiology laboratory. Dept. Biochemistry and Molecular Biomedicine. Facultat de Biologia. Universitat de Barcelona. 08028 Barcelona. Spain.
- <sup>7</sup> School of Chemistry. Universitat de Barcelona. Barcelona. Spain.

# equal contribution

#### \* Corresponding authors

Rafael Rivas-Santisteban  
rivasbioq@gmail.com

Laboratory of Computational Medicine, Biostatistics Unit, Faculty of Medicine, Autonomous University of Barcelona, Campus Bellaterra, 08193 Barcelona. Spain

Rafael Franco  
[rfranco@ub.edu](mailto:rfranco@ub.edu); [rfranco123@gmail.com](mailto:rfranco123@gmail.com)

Department of Biochemistry and Molecular Biomedicine, Faculty of Biology, Universitat de Barcelona, 08028 Barcelona, Spain.

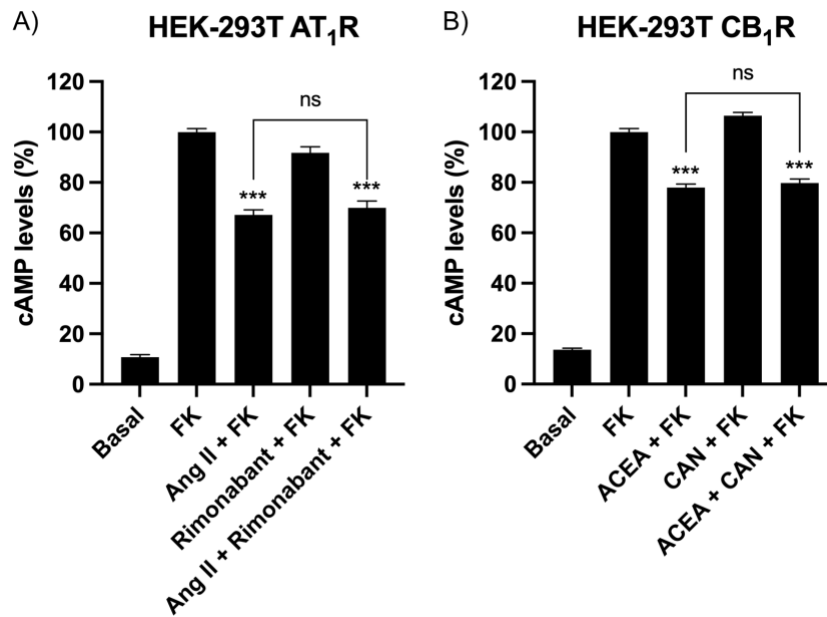

**Supplementary Figure S1. cAMP control assays testing the antagonists of the two receptors: candesartan and rimonabant.** HEK-293T cells expressing AT<sub>1</sub> (A) or CB<sub>1</sub> (B) receptors were pretreated with the solvent of ligands (vehicle) or receptor antagonists (1  $\mu$ M candesartan for CB<sub>1</sub>R or 1  $\mu$ M rimonabant for AT<sub>1</sub>R) and subsequently treated with selective agonists (100 nM Ang II for AT<sub>1</sub>R and/or 100 nM ACEA for CB<sub>1</sub>R). Panels A-B. G<sub>i</sub> protein-coupling was assessed by measuring the decreases in forskolin (FK)-induced cAMP levels; 0.5  $\mu$ M FK was used (added 15 min after the treatment with agonists). Values are the mean  $\pm$  S.E.M. of 3 independent experiments performed in triplicates. One-way ANOVA followed by Bonferroni's *post-hoc* test was used to compare cAMP levels (\*\*\*) $p$ < 0.001, versus FK condition) and (ns. versus Ang II (A) or ACEA (B) condition).

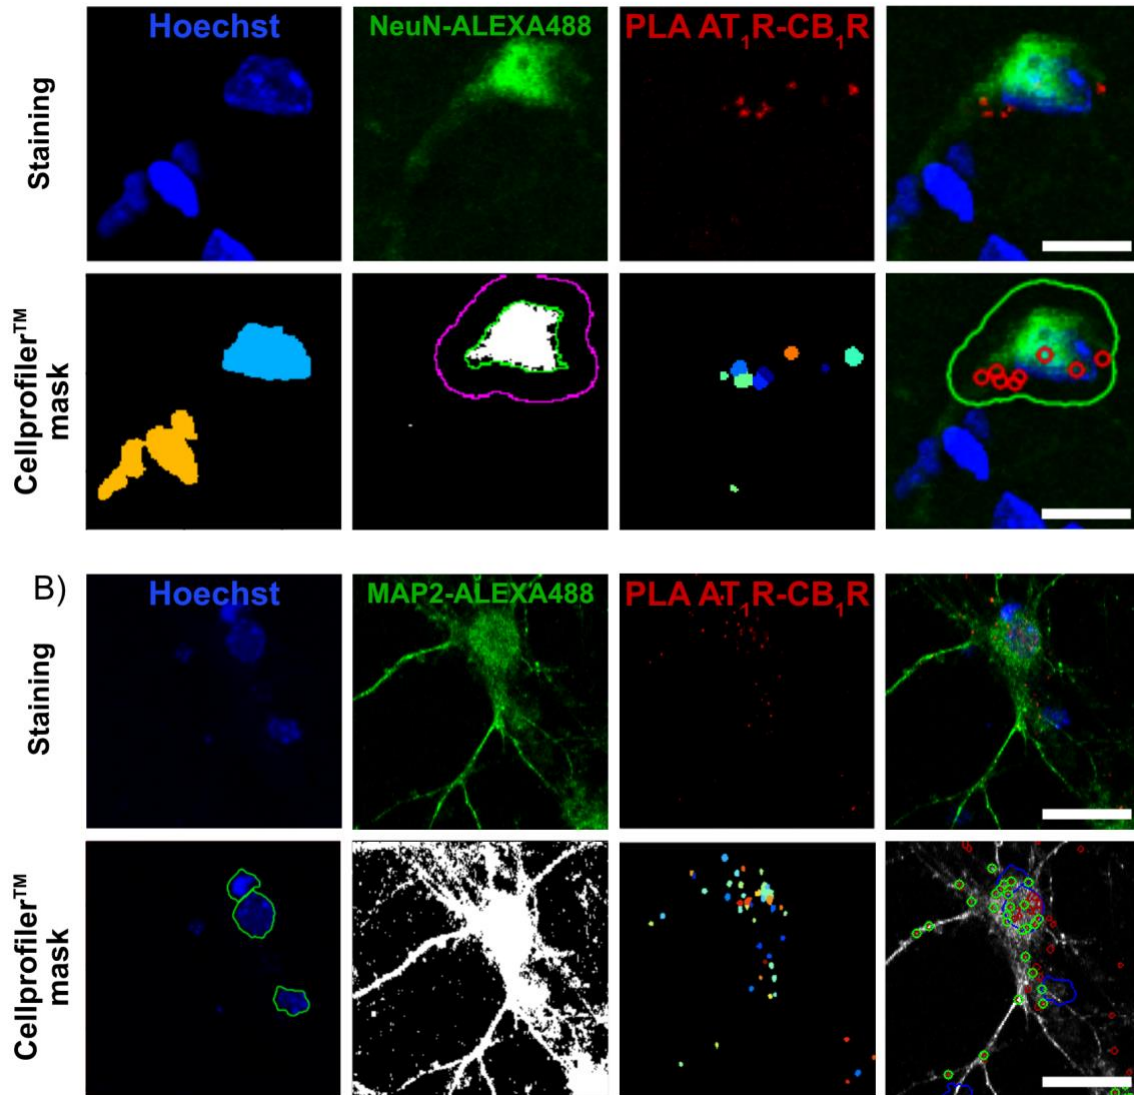

**Supplementary Figure S2. CellProfiler™ segmentation of nuclei and red dots for PLA quantification in neurons.** A) Neurons labelled for NeuN were detected by a CellProfiler™ pipeline (blue shadow mask) and distinguished from those without the neuronal marker (orange shadow mask). Only red dots surrounding cells presenting NeuN are quantified (red circles). Scale bar: 10  $\mu\text{m}$ . B) Cells labeled with MAP2 were detected by a CellProfiler™ pipeline. Only red dots in MAP2<sup>+</sup> cells were considered (green circles), excluding the other red dots (red circles). Scale bar: 20  $\mu\text{m}$ .
